# Supplementary material for: In Situ Formation of Surface-Induced Oxygen Vacancies in Co9S8/CoO/NC as a Bifunctional Electrocatalyst for Improved Oxygen and Hydrogen Evolution Reactions
Source: MDPI journal article supplement (doi:10.3390/nano11092237), 2021-08-30
Supplement: s1 [file s1]

## Supporting Information

### In-situ Formation of Surface-induced Oxygen Vacancies in Co<sub>9</sub>S<sub>8</sub>/CoO/NC as a Bifunctional Electrocatalyst for Improved Oxygen and Hydrogen Evolution Reactions

Khalil ur Rehman, Shaista Airam, Xiangyun Lin, Jian Gao, Qiang Guo and Zhipan Zhang

**Calculations for mass activity (MA), turn over frequency (TOF) and current density normalized by electrochemical active surface area.**

The mass activity (MA) is calculated according to Eqn. S1:

$$MA = J/m \quad \text{Eqn. S1}$$

where  $J$  (mA cm<sup>-2</sup>) is the current density and  $m$  for mass of electrocatalytic active sites deposited onto the GC electrode.

The turn over frequency (TOF) of the catalyst for OER and HER can be estimated by Eqn. S2 and S3.[S1]

$$TOF_{OER} = I/4Fn \quad \text{Eqn. S2}$$

$$TOF_{HER} = I/2Fn \quad \text{Eqn. S3}$$

Where  $I$  is the current (A) according to the linear sweep measurement,  $F$  is the Faraday constant ( $F = 96485 \text{ C mol}^{-1}$ ),  $n$  is the number of moles of surface atoms, which is estimated according to the equation S4. The factor 1/2 and 1/4 is based on consideration that two and four electrons are required to form one hydrogen and oxygen molecule.

$$n = [m_x/100M_s] \times (\text{surface atoms}\%) \quad \text{Eqn. S4}$$

where  $m$  is the weight (g) of the catalyst that loaded on GC electrode,  $x$  is weight proportion of the metal obtained from EDS, and  $M_s$  is the molar weight of the metal. While surface atoms% is estimated by dividing the thickness of the wall of the hollow dodecahedral structure (30 nm)

with the thickness of the single layer of Co<sub>9</sub>S<sub>8</sub> or CoO (0.426 nm). Here the estimated surface atoms% is 1.4% while for reference samples the same percentage has used.

The current density normalized by electrochemical active surface area ( $J_{ECSA}$ ) is calculated by

$$J_{ECSA} = I/ECSA \quad \text{Eqn. S5}$$

where  $I$  is the catalytic current (mA) and  $ECSA$  is the electrochemically active surface area of the catalyst which is calculated according to Eqn. S6

$$ECSA = C_{dl}/C_s \quad \text{Eqn. S6}$$

Where  $C_s$  is the specific capacitance, and its value was taken to be 40  $\mu\text{F cm}^{-2}$ . [S2] Noted that because it is difficult to determine the catalytic electrochemical surface area significantly in-real [S3,S4] a  $C_s$  value of 40  $\mu\text{F cm}^{-2}$  was thus adopted according to prior reported Co-based catalysts [S5] while the value of  $C_{dl}$  was calculated from cyclic voltammetry (CV) tests at different scan rates of 20-100  $\text{mV s}^{-1}$  in a narrow potential range selected between 1.02-1.12 V vs. RHE. Half of the linear slope gave the value of  $C_{dl}$  and obtained by plotting  $\Delta j$  versus different scan rates.

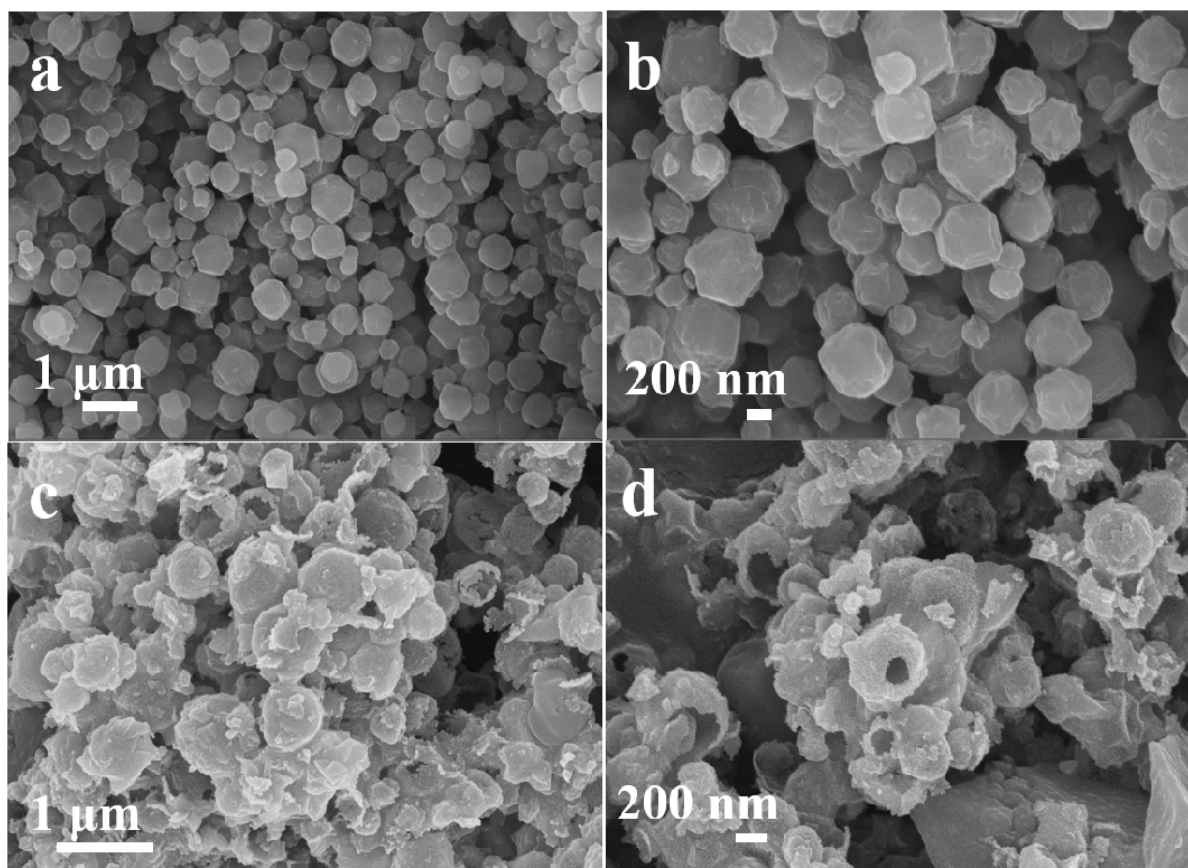

**Figure S1** Scanning electron microscope (SEM) images of ZIF-67 (**a, b**) and Co<sub>3</sub>S<sub>4</sub>/Co(OH)<sub>2</sub>/ZIF-67 (**c, d**).

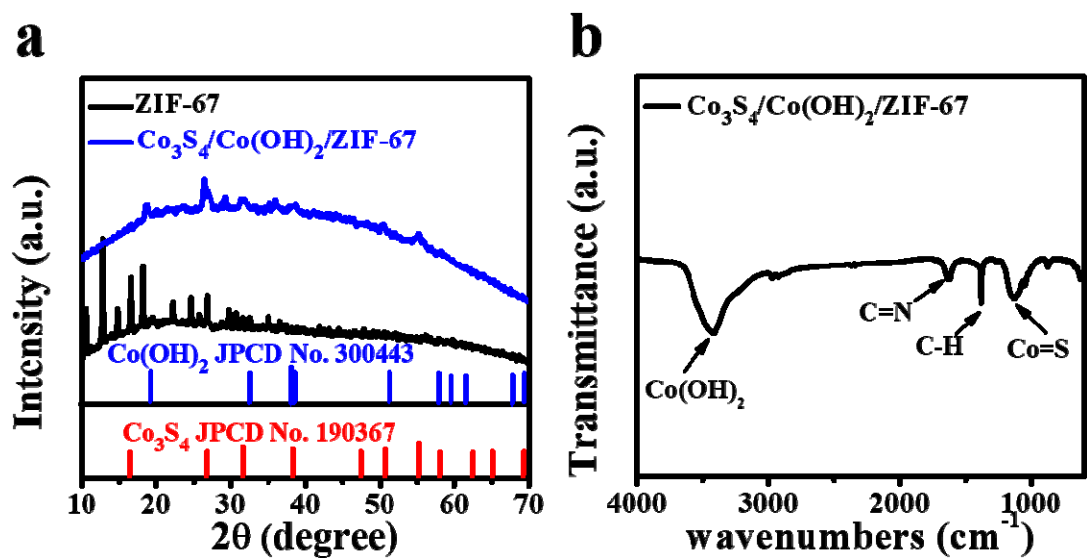

**Figure S2** (a) X-ray diffraction pattern (XRD) of ZIF-67 and Co<sub>3</sub>S<sub>4</sub>/Co(OH)<sub>2</sub>/ZIF-67, (b) FTIR spectrum of as-prepared Co<sub>3</sub>S<sub>4</sub>/Co(OH)<sub>2</sub>/ZIF-67 precursor.

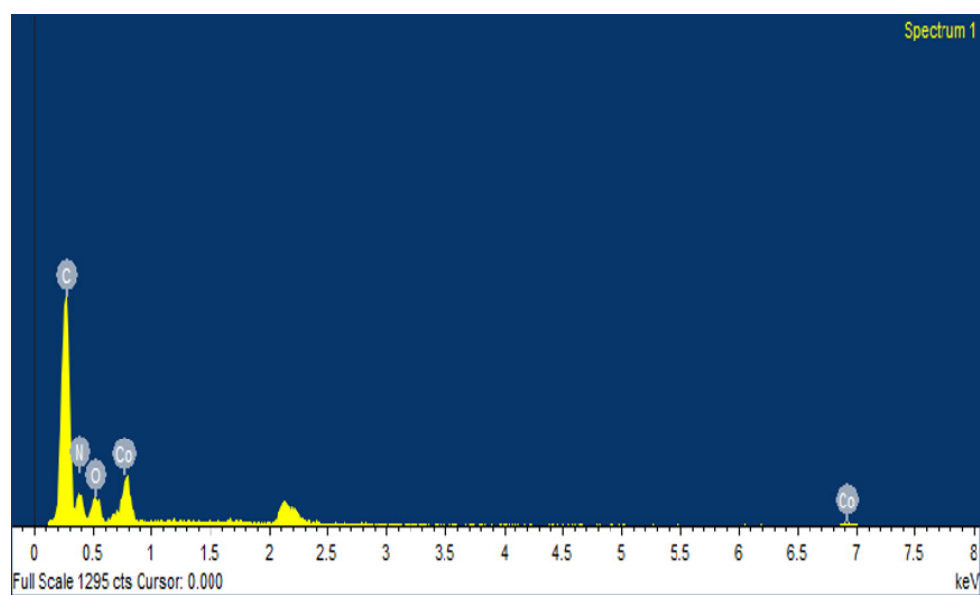

**Figure S3** EDS analysis of ZIF-67.

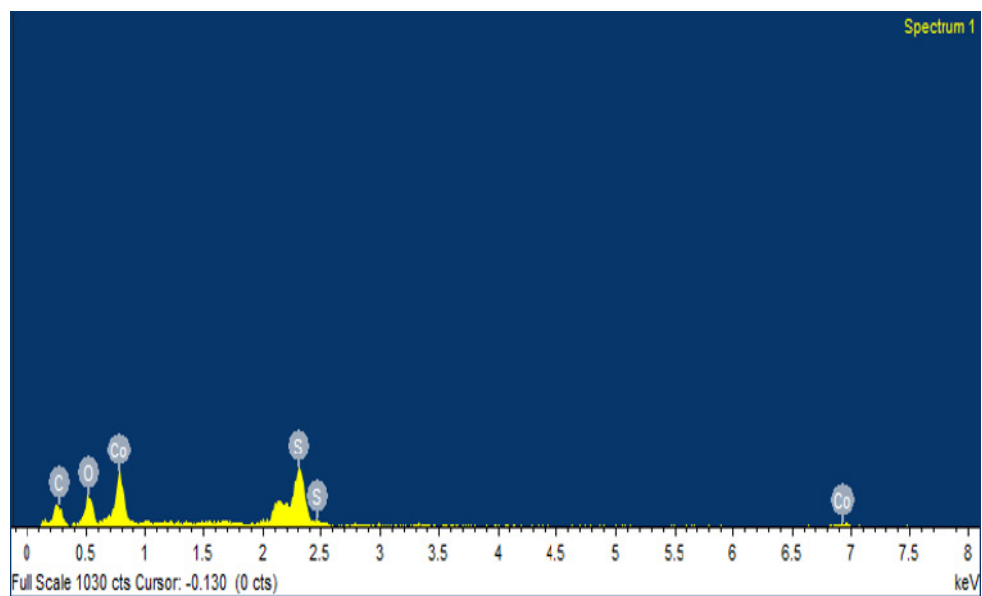

**Figure S4** EDS analysis of  $\text{Co}_3\text{S}_4/\text{Co}(\text{OH})_2/\text{ZIF-67}$ .

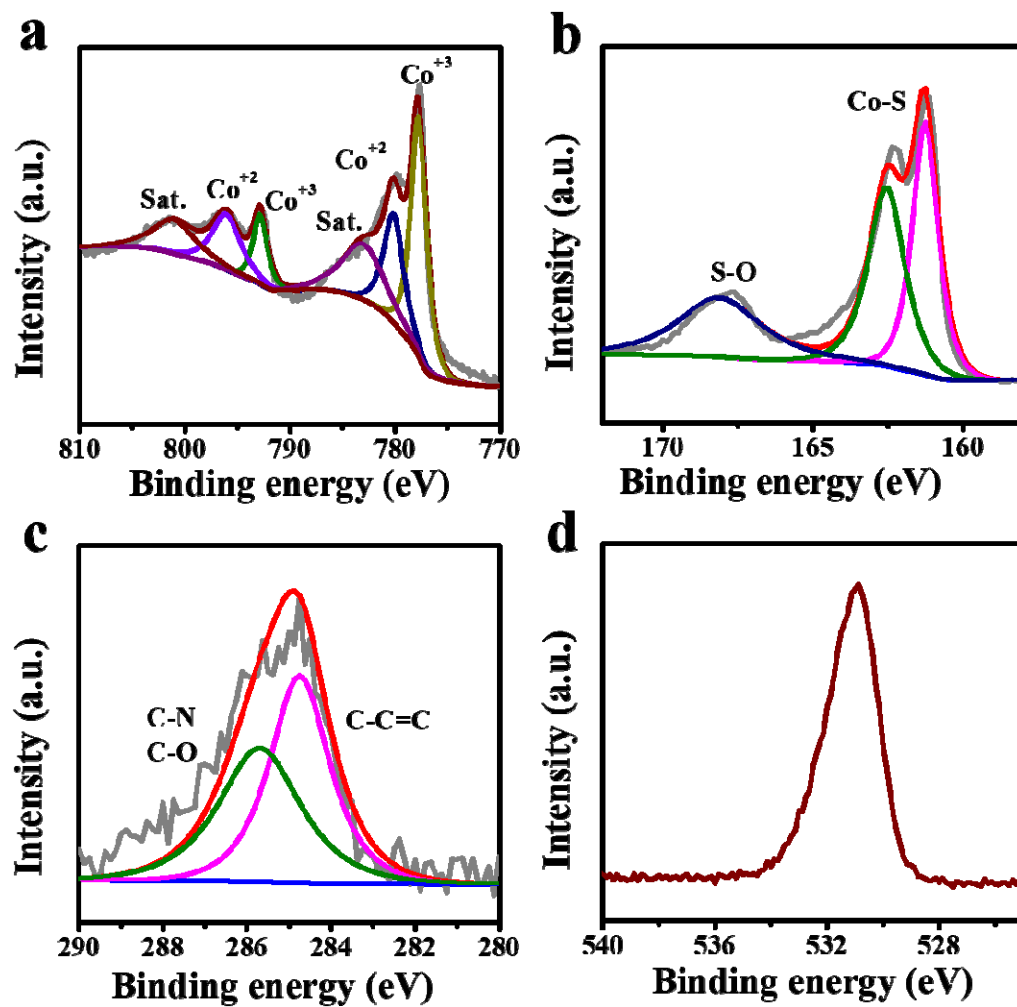

**Figure S5** X-ray photoelectron spectroscopy (XPS) spectra of  $\text{Co}_3\text{S}_4/\text{Co}(\text{OH})_2/\text{ZIF-67}$  precursor, (a) Co 2p, (b) S 2p, (c) C 1s, (d) O 1s.

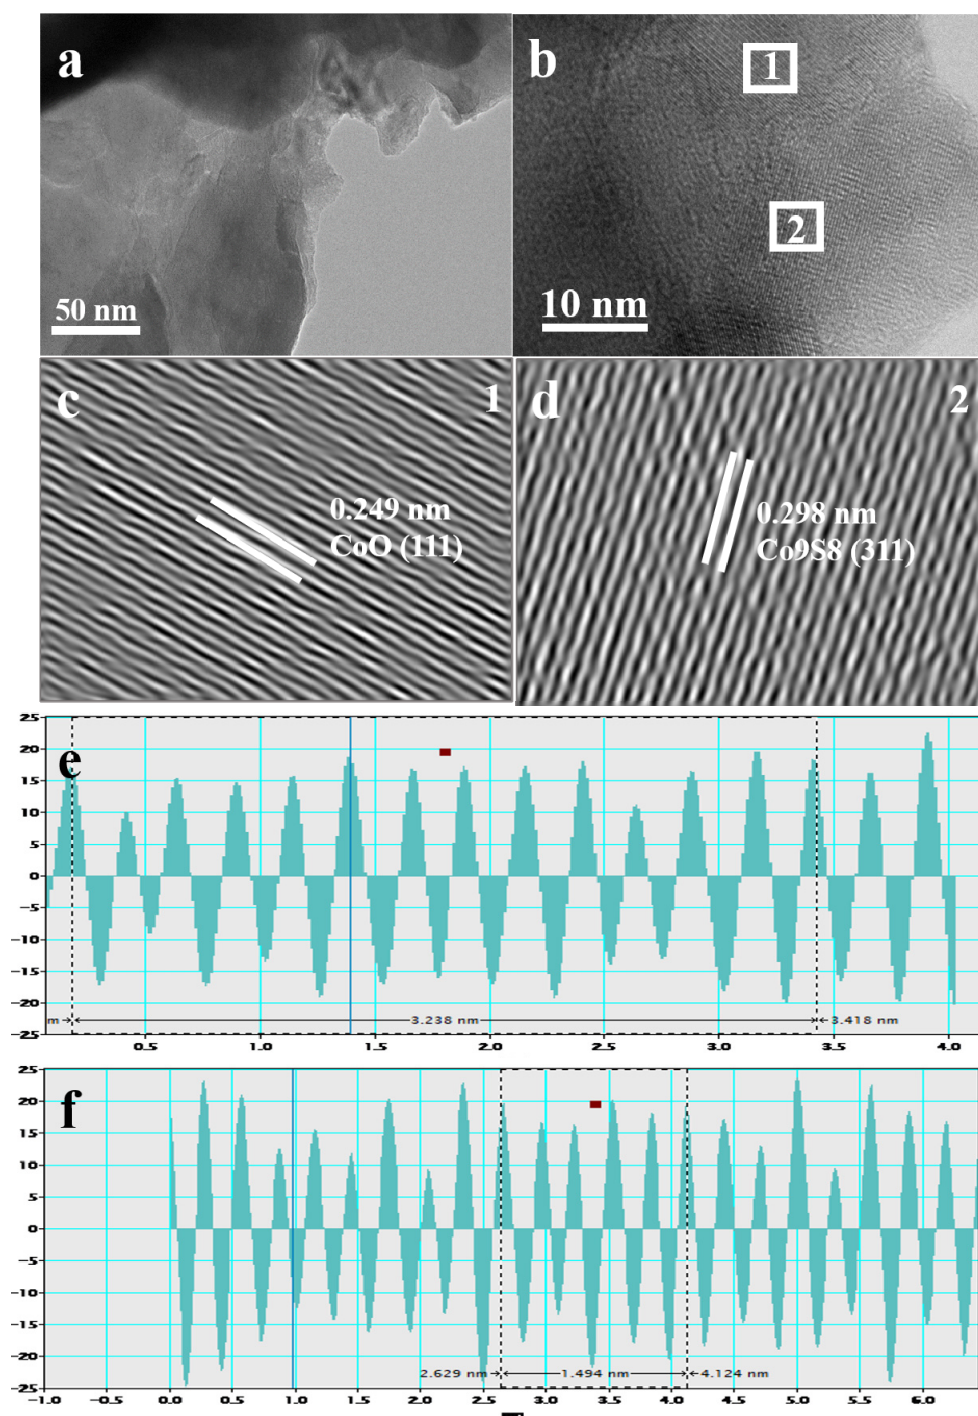

**Figure S6 (a-f)** HRTEM images and profile of the lattice fringes of ODR-Co<sub>9</sub>S<sub>8</sub>/CoO/NC heterostructure.



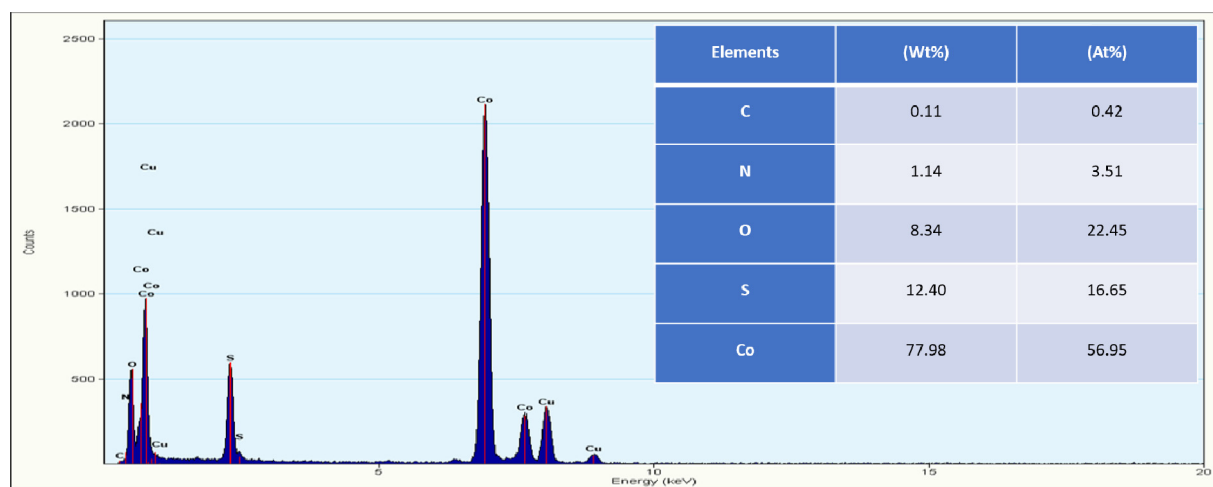

**Figure S7** EDX analysis of ODR-Co<sub>9</sub>S<sub>8</sub>/CoO/NC.

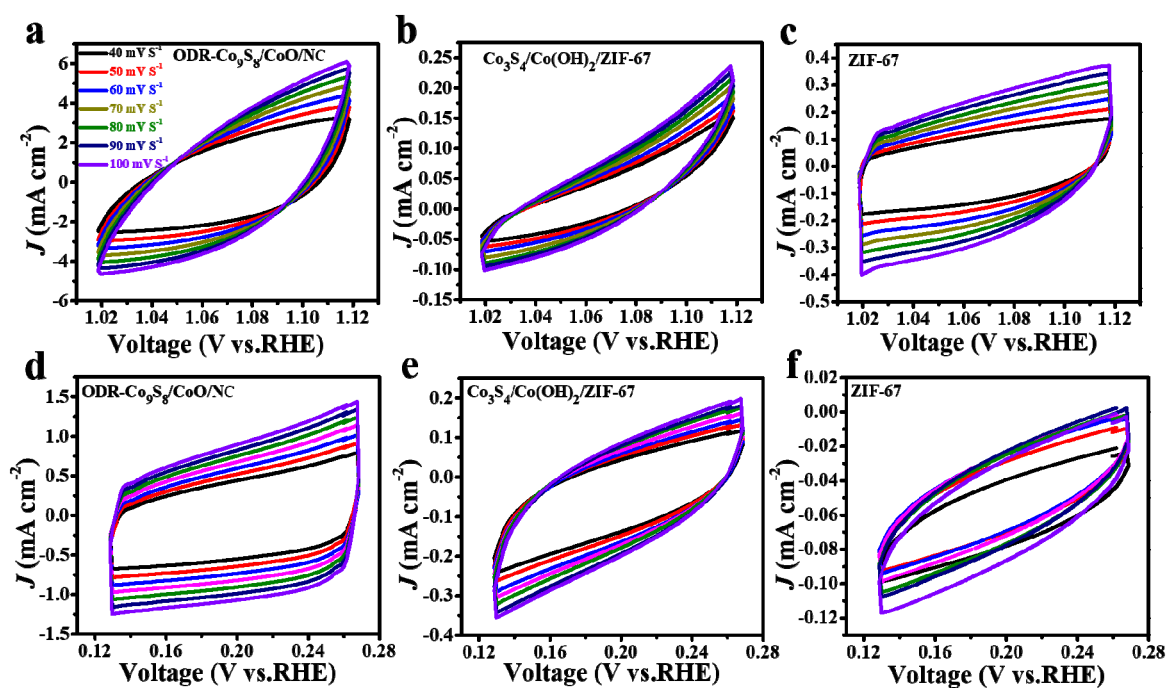

**Figure S8** CV curves of (a) ODR- $\text{Co}_9\text{S}_8/\text{CoO}/\text{NC}$ , (b)  $\text{Co}_3\text{S}_4/\text{Co}(\text{OH})_2/\text{ZIF-67}$  and (c) ZIF-67 for OER and (d) ODR- $\text{Co}_9\text{S}_8/\text{CoO}/\text{NC}$ , (e)  $\text{Co}_3\text{S}_4/\text{Co}(\text{OH})_2/\text{ZIF-67}$  and (f) ZIF-67 for HER.

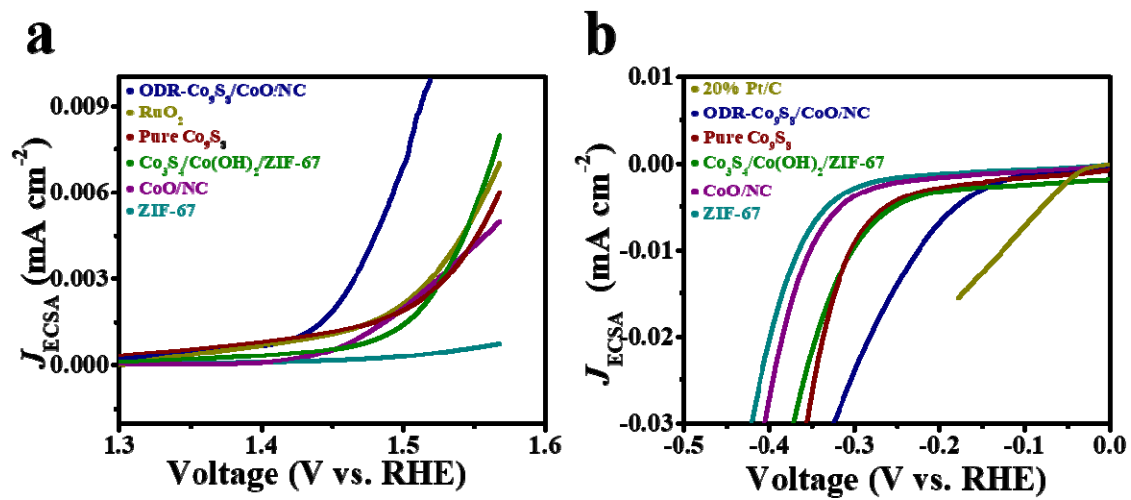

**Figure S9** ECSA normalized LSV curves of ODR- $\text{Co}_9\text{S}_8/\text{CoO/NC}$  in comparative to reference samples for (a) OER and (b) HER.

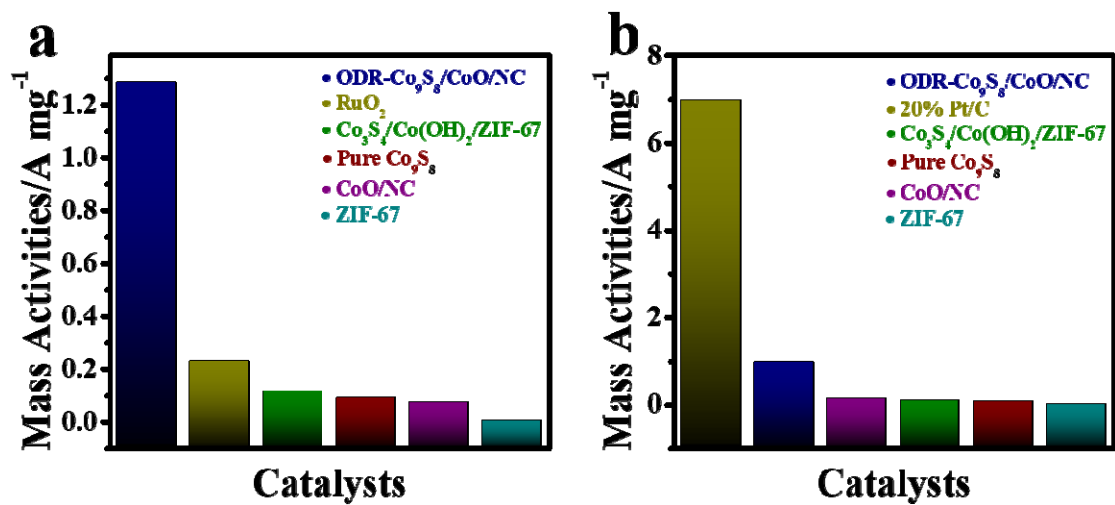

**Figure S10** (a) The mass activity of OER catalysts at 250 mV and (b) HER catalysts at 200 mV.

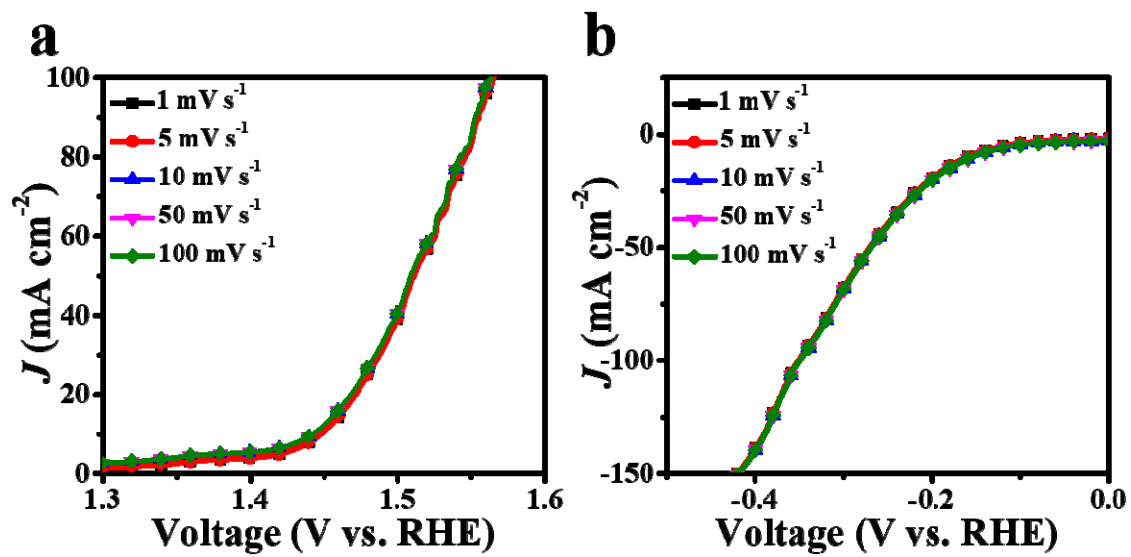

**Figure S11 (a-b)** OER and HER polarization curves of ODR-Co<sub>9</sub>S<sub>8</sub>/CoO/NC at different scan speeds.

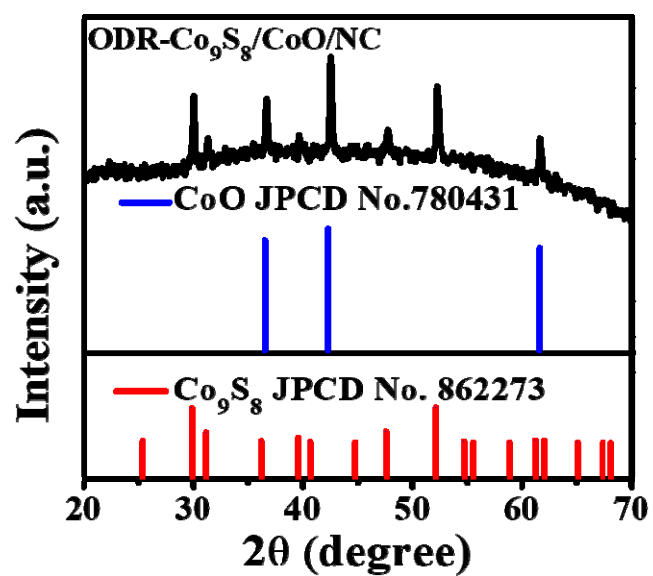

**Figure S12** The XRD spectrum of the ODR-Co<sub>9</sub>S<sub>8</sub>/CoO/NC heterostructures after electrocatalytic test.

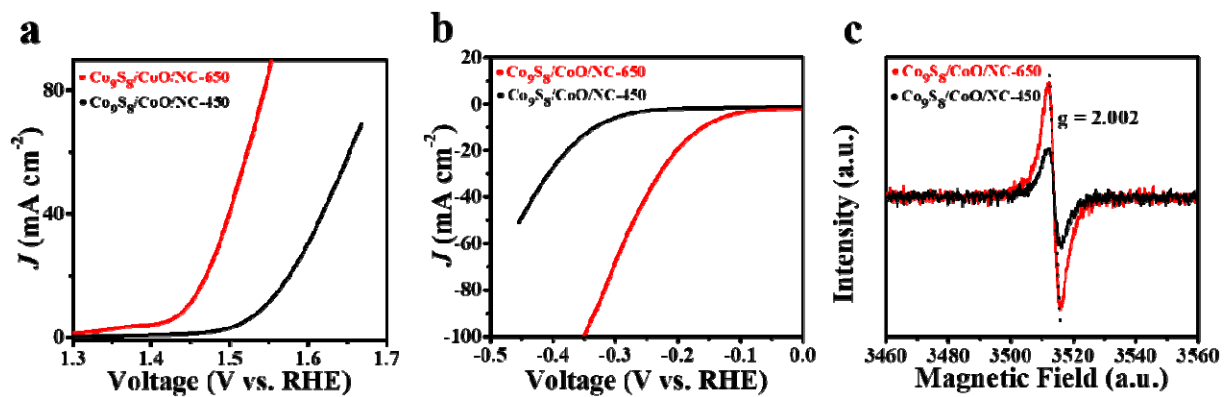

**Figure S13 (a, b)** OER and HER performance of  $\text{Co}_9\text{S}_8/\text{CoO}/\text{NC}-450$  and  $\text{Co}_9\text{S}_8/\text{CoO}/\text{NC}-650$ .  
**(c)** EPR spectrum of  $\text{Co}_9\text{S}_8/\text{CoO}/\text{NC}-450$  and  $\text{Co}_9\text{S}_8/\text{CoO}/\text{NC}-650$ .

**Table S1** The surface elemental composition of the as-prepared ODR-Co<sub>9</sub>S<sub>8</sub>/CoO/NC heterostructures according the XPS measurements.

| Samples                                    | Co/XPS<br>(At. %) | N/XPS<br>(At. %) | C/XPS<br>(At. %) | S/XPS<br>(At. %) | O/XPS<br>(At. %) |
|--------------------------------------------|-------------------|------------------|------------------|------------------|------------------|
| ODR-Co <sub>9</sub> S <sub>8</sub> /CoO/NC | 14.99             | 1.96             | 14.79            | 14.49            | 53.77            |



**Table S2** Comparison of electrochemical surface area (ECSA) of ODR-Co<sub>9</sub>S<sub>8</sub>/CoO/NC and reference samples for OER and HER.

| <b>Catalysts</b>                                            | <b>C<sub>dl</sub> (mF cm<sup>-2</sup>)<br/>(OER)</b> | <b>ECSA (cm<sup>2</sup>)<br/>(OER)</b> | <b>C<sub>dl</sub> (mF cm<sup>-2</sup>)<br/>(HER)</b> | <b>ECSA (cm<sup>2</sup>)<br/>(HER)</b> |
|-------------------------------------------------------------|------------------------------------------------------|----------------------------------------|------------------------------------------------------|----------------------------------------|
| ODR-Co <sub>9</sub> S <sub>8</sub> /CoO/NC                  | 39.4                                                 | 985                                    | 16.6                                                 | 415                                    |
| Co <sub>3</sub> S <sub>4</sub> /Co(OH) <sub>2</sub> /ZIF-67 | 4.1                                                  | 102.5                                  | 1.74                                                 | 43.5                                   |
| Pure Co <sub>9</sub> S <sub>8</sub>                         | 6                                                    | 150                                    | 1.6                                                  | 40                                     |
| CoO/NC                                                      | 2.8                                                  | 70                                     | 0.8                                                  | 20                                     |
| ZIF-67                                                      | 1                                                    | 25                                     | 0.05                                                 | 1.25                                   |

**Table S3** TOF of OER and HER catalysts.

| <b>Catalyst</b>                                             | <b>TOF (OER)</b><br>(mol s <sup>-1</sup> ) | <b>TOF (HER)</b><br>(mol s <sup>-1</sup> ) |
|-------------------------------------------------------------|--------------------------------------------|--------------------------------------------|
| ODR-Co <sub>9</sub> S <sub>8</sub> /CoO/NC                  | 9.3×10 <sup>-3</sup>                       | 1.3×10 <sup>-2</sup>                       |
| Co <sub>3</sub> S <sub>4</sub> /Co(OH) <sub>2</sub> /ZIF-67 | 1.6×10 <sup>-3</sup>                       | 2.1×10 <sup>-3</sup>                       |
| Pure Co <sub>9</sub> S <sub>8</sub>                         | 2.4×10 <sup>-3</sup>                       | 1.7×10 <sup>-3</sup>                       |
| CoO/NC                                                      | 7×10 <sup>-4</sup>                         | 1×10 <sup>-3</sup>                         |
| ZIF-67                                                      | 1.3×10 <sup>-4</sup>                       | 3.9×10 <sup>-4</sup>                       |

**Table S4** Comparison of some previously reported cobalt based electrocatalysts for OER.

| Catalyst                                                                          | Mass loading<br>(mg cm <sup>-2</sup> ) | Electrolyte | $\eta_{(j=10 \text{ mA cm}^{-2})}$<br>(mV) | Tafel slope<br>(mV dec <sup>-1</sup> ) | Reference        |
|-----------------------------------------------------------------------------------|----------------------------------------|-------------|--------------------------------------------|----------------------------------------|------------------|
| CoO hexagrams                                                                     | 0.27                                   | 1 M KOH     | 269                                        | 64.4                                   | [S6]             |
| CoO nanorods                                                                      | 0.4                                    | 1 M KOH     | 330                                        | 44                                     | [S7]             |
| CoOx@NC nanoarrays                                                                | 0.45                                   | 0.1 M KOH   | 348                                        | N/A                                    | [S8]             |
| CoO/C nanocrystals                                                                | 0.31                                   | 0.1 M KOH   | 362                                        | 45.2                                   | [S9]             |
| N-CoO nanowires                                                                   | N/A                                    | 1M KOH      | 319                                        | 74                                     | [S10]            |
| CoO/NF                                                                            | N/A                                    | 1M KOH      | 307                                        | 72                                     | [S11]            |
| Co-CoO/BC<br>yolk-shell                                                           | N/A                                    | 1M KOH      | 300                                        | 73.3                                   | [S12]            |
| Co <sub>9</sub> S <sub>8</sub><br>hollow microplates                              | 0.37                                   | 1M KOH      | 278                                        | 53                                     | [S13]            |
| Co <sub>9</sub> S <sub>8</sub> /CS                                                | 0.15                                   | 0.1 M KOH   | 370                                        | 98                                     | [S14]            |
| Co/S/N-800                                                                        | 0.1                                    | 0.1 M KOH   | 361                                        | 74                                     | [S15]            |
| Co <sub>9</sub> S <sub>8</sub> /NSCNFs                                            | 0.21                                   | 1 M KOH     | 302                                        | 54                                     | [S16]            |
| Co <sub>9</sub> S <sub>8</sub> @NOSC                                              | 0.28                                   | 1 M KOH     | 340                                        | 68                                     | [S17]            |
| Co/Co <sub>9</sub> S <sub>8</sub> @SNGS                                           | 0.30                                   | 0.1 M KOH   | 290                                        | 80.2                                   | [S18]            |
| Co <sub>3</sub> O <sub>4</sub> -CoO<br>heterostructure                            | N/A                                    | 1 M KOH     | 270                                        | 49                                     | [S19]            |
| Co <sub>9</sub> S <sub>8</sub> /Co <sub>3</sub> O <sub>4</sub><br>heterostructure | N/A                                    | 1 M KOH     | 250                                        | 73.5                                   | [S20]            |
| Co <sub>9</sub> S <sub>8</sub> /N,S-rGO                                           | N/A                                    | 1 M KOH     | 266                                        | 75.5                                   | [S21]            |
| ODR-Co <sub>9</sub> S <sub>8</sub> /CoO/NC                                        | 0.28                                   | 0.1 M KOH   | 217                                        | 70                                     | <b>This work</b> |

**Table S5** Comparison of some previously reported cobalt based electrocatalysts for HER.

| Catalyst                                                       | Mass loading<br>(mg cm <sup>-2</sup> ) | Electrolyte | $\eta_{(J=10 \text{ mA cm}^{-2})}$<br>(mV) | Tafel slope<br>(mV dec <sup>-1</sup> ) | Reference        |
|----------------------------------------------------------------|----------------------------------------|-------------|--------------------------------------------|----------------------------------------|------------------|
| CoO/NF                                                         | N/A                                    | 1 M KOH     | 224                                        | 72                                     | [S11]            |
| CoO/N-S-UPCNPs                                                 | 0.28                                   | 1 M KOH     | 110                                        | 94                                     | [S22]            |
| C@CoO/CC                                                       | N/A                                    | 1 M KOH     | 120                                        | 129                                    | [S23]            |
| CoO <sub>x</sub> @CN                                           | 0.12                                   | 1 M KOH     | 232                                        | N/A                                    | [S24]            |
| Co@CoO/NG                                                      | 2                                      | 1 M KOH     | 112                                        | 119                                    | [S25]            |
| Co/CoO                                                         | N/A                                    | 1 M KOH     | 160                                        | 68.1                                   | [S26]            |
| Co <sub>9</sub> S <sub>8</sub> /Co <sub>3</sub> O <sub>4</sub> | N/A                                    | 1 M KOH     | 250                                        | 73.5                                   | [S20]            |
| Co/Co <sub>9</sub> S <sub>8</sub> @NSOC                        | 0.64                                   | 1 M KOH     | 216                                        | 149                                    | [S27]            |
| Co <sub>9</sub> S <sub>8</sub> /CoNCNT                         | 0.56                                   | 1 M KOH     | 196                                        | 84.9                                   | [S28]            |
| Co <sub>9</sub> S <sub>8</sub> /N,S-rGO                        | 0.37                                   | 1 M KOH     | 334.2                                      | 118                                    | [S21]            |
| Co <sub>9</sub> S <sub>8</sub> @N-S-HPC                        | 0.26                                   | 1 M KOH     | 173                                        | 78                                     | [S29]            |
| N,S- Co <sub>9</sub> S <sub>8</sub> NPS/MC                     | N/A                                    | 1 M KOH     | 196                                        | 75.5                                   | [S30]            |
| CoSA+Co <sub>9</sub> S <sub>8</sub> /HCNT                      | 0.97                                   | 1 M KOH     | 250                                        | 101                                    | [S31]            |
| Co <sub>9</sub> S <sub>8</sub> @C                              | 0.3                                    | 1 M KOH     | 250                                        | NA                                     | [S32]            |
| ODR-<br>Co <sub>9</sub> S <sub>8</sub> /CoO/NC                 | 0.28                                   | 0.1 M KOH   | 160                                        | 90                                     | <b>This work</b> |

## References to supporting information

- [S1]. Cheng, Z.; Fu, Q.; Han, Q.; Xiao, Y.; Liang, Y.; Zhao, Y.; Qu, L. A Type of 1 nm Molybdenum Carbide Confined within Carbon Nanomesh as Highly Efficient Bifunctional Electrocatalyst. *Adv. Funct. Mater.* 2018, 28, 1705967, doi:<https://doi.org/10.1002/adfm.201705967>.
- [S2]. McCrory, C.C.L.; Jung, S.; Peters, J.C.; Jaramillo, T.F. Benchmarking Heterogeneous Electrocatalysts for the Oxygen Evolution Reaction. *J. Am. Chem. Soc.* 2013, 135, 16977–16987, doi:10.1021/ja407115p.
- [S3]. Sun, S.; Li, H.; Xu, Z.J. Impact of Surface Area in Evaluation of Catalyst Activity. *Joule* 2018, 2, 1024–1027, doi:<https://doi.org/10.1016/j.joule.2018.05.003>.
- [S4]. Zheng, Y.-R.; Wu, P.; Gao, M.-R.; Zhang, X.-L.; Gao, F.-Y.; Ju, H.-X.; Wu, R.; Gao, Q.; You, R.; Huang, W.-X.; et al. Doping-induced structural phase transition in cobalt diselenide enables enhanced hydrogen evolution catalysis. *Nat. Commun.* 2018, 9, 2533, doi:10.1038/s41467-018-04954-7.
- [S5]. Zhang, Y.; Shao, Q.; Pi, Y.; Guo, J.; Huang, X. A Cost-Efficient Bifunctional Ultrathin Nanosheets Array for Electrochemical Overall Water Splitting. *Small* 2017, 13, 1700355, doi:<https://doi.org/10.1002/sml.201700355>.
- [S6]. Liang, Z.; Huang, Z.; Yuan, H.; Yang, Z.; Zhang, C.; Xu, Y.; Zhang, W.; Zheng, H.; Cao, R. Quasi-single-crystalline CoO hexagrams with abundant defects for highly efficient electrocatalytic water oxidation. *Chem. Sci.* 2018, 9, 6961–6968, doi:10.1039/C8SC02294A.
- [S7]. Ling, T.; Yan, D.-Y.; Jiao, Y.; Wang, H.; Zheng, Y.; Zheng, X.; Mao, J.; Du, X.-W.; Hu, Z.; Jaroniec, M.; et al. Engineering surface atomic structure of single-crystal cobalt (II) oxide nanorods for superior electrocatalysis. *Nat. Commun.* 2016, 7, 12876, doi:10.1038/ncomms12876.
- [S8]. Hao, Y.; Xu, Y.; Han, N.; Liu, J.; Sun, X. Boosting the bifunctional electrocatalytic oxygen activities of CoOx nanoarrays with a porous N-doped carbon coating and their application in Zn–air batteries. *J. Mater. Chem. A* 2017, 5, 17804–17810,

doi:10.1039/C7TA03996D.

- [S9]. Kim, H.; Kim, Y.; Noh, Y.; Lee, S.; Sung, J.; Kim, W.B. Thermally Converted CoO Nanoparticles Embedded into N-Doped Carbon Layers as Highly Efficient Bifunctional Electrocatalysts for Oxygen Reduction and Oxygen Evolution Reactions. *ChemCatChem* 2017, 9, 1503–1510, doi:10.1002/cctc.201601705.
- [S10]. Zhang, K.; Xia, X.; Deng, S.; Xie, D.; Lu, Y.; Wang, Y.; Wu, J.; Wang, X.; Tu, J. N-doped CoO nanowire arrays as efficient electrocatalysts for oxygen evolution reaction. *J. Energy Chem.* 2019, 37, 13–17, doi:https://doi.org/10.1016/j.jechem.2018.11.013.
- [S11]. Zhu, S.; Lei, J.; Zhang, L.; He, J. CoO/NF nanowires promote hydrogen and oxygen production for overall water splitting in alkaline media. *Int. J. Hydrogen Energy* 2020, 45, 8031–8040, doi:https://doi.org/10.1016/j.ijhydene.2020.01.085.
- [S12]. Yang, M.; Wu, D.; Cheng, D. Biomass-derived porous carbon supported CoCoO yolk-shell nanoparticles as enhanced multifunctional electrocatalysts. *Int. J. Hydrogen Energy* 2019, 44, 6525–6534, doi:https://doi.org/10.1016/j.ijhydene.2019.01.155.
- [S13]. Liu, H.; Ma, F.-X.; Xu, C.-Y.; Yang, L.; Du, Y.; Wang, P.-P.; Yang, S.; Zhen, L. Sulfurizing-Induced Hollowing of Co<sub>9</sub>S<sub>8</sub> Microplates with Nanosheet Units for Highly Efficient Water Oxidation. *ACS Appl. Mater. Interfaces* 2017, 9, 11634–11641, doi:10.1021/acsami.7b00899.
- [S14]. Li, W.; Li, Y.; Wang, H.; Cao, Y.; Yu, H.; Peng, F. Co<sub>9</sub>S<sub>8</sub>-porous carbon spheres as bifunctional electrocatalysts with high activity and stability for oxygen reduction and evolution reactions. *Electrochim. Acta* 2018, 265, 32–40, doi:https://doi.org/10.1016/j.electacta.2018.01.095.
- [S15]. Jia, N.; Liu, J.; Gao, Y.; Chen, P.; Chen, X.; An, Z.; Li, X.; Chen, Y. Graphene-Encapsulated Co<sub>9</sub>S<sub>8</sub> Nanoparticles on N,S-Codoped Carbon Nanotubes: An Efficient Bifunctional Oxygen Electrocatalyst. *ChemSusChem* 2019, 12, 3390–3400, doi:10.1002/cssc.201900383.
- [S16]. Wu, L.-L.; Wang, Q.-S.; Li, J.; Long, Y.; Liu, Y.; Song, S.-Y.; Zhang, H.-J. Co<sub>9</sub>S<sub>8</sub> Nanoparticles-Embedded N/S-Codoped Carbon Nanofibers Derived from Metal–Organic

- Framework-Wrapped CdS Nanowires for Efficient Oxygen Evolution Reaction. *Small* 2018, *14*, 1704035, doi:10.1002/sml.201704035.
- [S17]. Huang, S.; Meng, Y.; He, S.; Goswami, A.; Wu, Q.; Li, J.; Tong, S.; Asefa, T.; Wu, M. N-, O-, and S-Tridoped Carbon-Encapsulated Co<sub>9</sub>S<sub>8</sub> Nanomaterials: Efficient Bifunctional Electrocatalysts for Overall Water Splitting. *Adv. Funct. Mater.* 2017, *27*, 1606585, doi:10.1002/adfm.201606585.
- [S18]. Zhang, X.; Liu, S.; Zang, Y.; Liu, R.; Liu, G.; Wang, G.; Zhang, Y.; Zhang, H.; Zhao, H. Co/Co<sub>9</sub>S<sub>8</sub>@S,N-doped porous graphene sheets derived from S, N dual organic ligands assembled Co-MOFs as superior electrocatalysts for full water splitting in alkaline media. *Nano Energy* 2016, *30*, 93–102, doi:https://doi.org/10.1016/j.nanoen.2016.09.040.
- [S19]. Qi, J.; Yan, Y.; Liu, T.; Zhou, X.; Cao, J.; Feng, J. Plasma-induced surface reorganization of porous Co<sub>3</sub>O<sub>4</sub>-CoO heterostructured nanosheets for electrocatalytic water oxidation. *J. Colloid Interface Sci.* 2020, *565*, 400–404, doi:https://doi.org/10.1016/j.jcis.2020.01.045.
- [S20]. Peng, D.; Zhang, B.; Wu, J.; Huang, K.; Cao, X.; Lu, Y.; Zhang, Y.; Li, C.; Huang, Y. Growth of Lattice Coherent Co<sub>9</sub>S<sub>8</sub>/Co<sub>3</sub>O<sub>4</sub> Nano-Heterostructure for Maximizing the Catalysis of Co-Based Composites. *ChemCatChem* 2020, *12*, 2431–2435, doi:10.1002/cctc.202000044.
- [S21]. Liu, H.; Xu, C.-Y.; Du, Y.; Ma, F.-X.; Li, Y.; Yu, J.; Zhen, L. Ultrathin Co<sub>9</sub>S<sub>8</sub> nanosheets vertically aligned on N,S/rGO for low voltage electrolytic water in alkaline media. *Sci. Rep.* 2019, *9*, 1951, doi:10.1038/s41598-018-35831-4.
- [S22]. Chao, S.; Wu, H.; Xia, Q.; Wang, G. Ultrathin Two-Dimensional Metal-Organic-Framework-Derived CoO/Nitrogen and Sulfur Co-doped Ultrathin Porous Carbon Nanoplates for Highly Efficient Water Electrolysis. *ChemElectroChem* 2019, *6*, 3940–3948, doi:10.1002/celec.201900939.
- [S23]. Jin, W.; Guo, X.; Zhang, J.; Zheng, L.; Liu, F.; Hu, Y.; Mao, J.; Liu, H.; Xue, Y.; Tang, C. Ultrathin carbon coated CoO nanosheet arrays as efficient electrocatalysts for the hydrogen evolution reaction. *Catal. Sci. Technol.* 2019, *9*, 6957–6964, doi:10.1039/C9CY01645G.

- [S24]. Jin, H.; Wang, J.; Su, D.; Wei, Z.; Pang, Z.; Wang, Y. In situ Cobalt–Cobalt Oxide/N-Doped Carbon Hybrids As Superior Bifunctional Electrocatalysts for Hydrogen and Oxygen Evolution. *J. Am. Chem. Soc.* 2015, *137*, 2688–2694, doi:10.1021/ja5127165.
- [S25]. Zhang, S.; Yu, X.; Yan, F.; Li, C.; Zhang, X.; Chen, Y. N-Doped graphene-supported Co@CoO core–shell nanoparticles as high-performance bifunctional electrocatalysts for overall water splitting. *J. Mater. Chem. A* 2016, *4*, 12046–12053, doi:10.1039/C6TA04365H.
- [S26]. Cao, J.; Chen, X.; Li, H.; Pu, J.; Liu, L.; Ma, L.; Zhou, K.; Zhang, Z.; Wei, Q.; Luo, F. A Co/CoO hybrid rooted on carbon cloth as an efficient electrocatalyst for the hydrogen evolution reaction in alkaline solution. *Sustain. Energy Fuels* 2020, *4*, 1924–1932, doi:10.1039/C9SE01128E.
- [S27]. Du, J.; Wang, R.; Lv, Y.-R.; Wei, Y.-L.; Zang, S.-Q. One-step MOF-derived Co/Co<sub>9</sub>S<sub>8</sub> nanoparticles embedded in nitrogen, sulfur and oxygen ternary-doped porous carbon: an efficient electrocatalyst for overall water splitting. *Chem. Commun.* 2019, *55*, 3203–3206, doi:10.1039/C9CC00196D.
- [S28]. Liang, D.; Mao, J.; Liu, P.; Yan, J.; Song, W. In-situ growth of NCNT and encapsulation of Co<sub>9</sub>S<sub>8</sub>/Co as a sustainable multifunctional electrocatalyst. *J. Colloid Interface Sci.* 2019, *557*, 291–300, doi:https://doi.org/10.1016/j.jcis.2019.09.018.
- [S29]. Zhang, S.; Zhai, D.; Sun, T.; Han, A.; Zhai, Y.; Cheong, W.-C.; Liu, Y.; Su, C.; Wang, D.; Li, Y. In situ embedding Co<sub>9</sub>S<sub>8</sub> into nitrogen and sulfur codoped hollow porous carbon as a bifunctional electrocatalyst for oxygen reduction and hydrogen evolution reactions. *Appl. Catal. B Environ.* 2019, *254*, 186–193, doi:https://doi.org/10.1016/j.apcatb.2019.04.096.
- [S30]. Yu, H.; Zhang, W.; Miao, S.; Du, Y.; Huang, Y.; Tang, D.; Qiao, Z.-A.; Wang, J.; Zhao, Z. Synthesis of Co<sub>9</sub>S<sub>8</sub> nanoparticle embedded, N, S Co-doped mesoporous carbon with salts as templates for electrocatalytic hydrogen evolution. *Microporous Mesoporous Mater.* 2020, *302*, 110235, doi:https://doi.org/10.1016/j.micromeso.2020.110235.
- [S31]. Li, Y.; Cao, R.; Li, L.; Tang, X.; Chu, T.; Huang, B.; Yuan, K.; Chen, Y. Simultaneously



Integrating Single Atomic Cobalt Sites and Co<sub>9</sub>S<sub>8</sub> Nanoparticles into Hollow Carbon Nanotubes as Trifunctional Electrocatalysts for Zn–Air Batteries to Drive Water Splitting. *Small* 2020, 16, 1906735, doi:10.1002/sml.201906735.

[S32]. Feng, L.-L.; Li, G.-D.; Liu, Y.; Wu, Y.; Chen, H.; Wang, Y.; Zou, Y.-C.; Wang, D.; Zou, X. Carbon-Armored Co<sub>9</sub>S<sub>8</sub> Nanoparticles as All-pH Efficient and Durable H<sub>2</sub>-Evolving Electrocatalysts. *ACS Appl. Mater. Interfaces* 2015, 7, 980–988, doi:10.1021/am507811a.
